# Supplementary material for: Fluoride-driven ‘turn on’ ESPT in the binding with a novel benzimidazole-based sensor
Source: publisher site journal article supplement (doi:10.3762/bjoc.11.61), 2015-04-24
Supplement: Additional file 1 [file 1860-5397-11-61-S1.pdf]

## Supporting Information

for

### **Fluoride-driven ‘turn on’ ESPT in the binding with a novel benzimidazole-based sensor**

Kai Liu<sup>\*1,2</sup>, Xiaojun Zhao<sup>1</sup>, Qingxiang Liu<sup>2</sup>, Jianzhong Huo<sup>2</sup>, Bolin Zhu<sup>2</sup>, Shihua Diao<sup>2</sup>

Address: <sup>1</sup>Key Laboratory of Inorganic-Organic hybrid Functional Material Chemistry, Ministry of Education, Tianjin Normal University, Tianjin, 300387, China and <sup>2</sup>Tianjin Key Laboratory of Structure and Performance for Functional Molecules, College of Chemistry, Tianjin Normal University, Tianjin, 300387, China

Email: Kai Liu\* - [hxxylk@mail.tjnu.edu.cn](mailto:hxxylk@mail.tjnu.edu.cn)

\*Corresponding author

## 1. Binding constants determination by UV-vis and fluorescence methods

Binding constants (K) were calculated by non-linear least-square analysis of the titration curves according to the following relation for 1:1 complexation.

$$\Delta X = A \left\{ C_H + C_G + B - \left[ (C_H + C_G + B)^2 - 4C_H C_G \right]^{\frac{1}{2}} \right\}$$

where  $\Delta X$  is the difference value between the absorbance (or emission intensity) of the whole system and the absorbance of free host, A is a floating parameter in the analysis, B is the ratio between 1 to k (binding association),  $C_H$  and  $C_G$  are the concentration of host and guest, respectively.

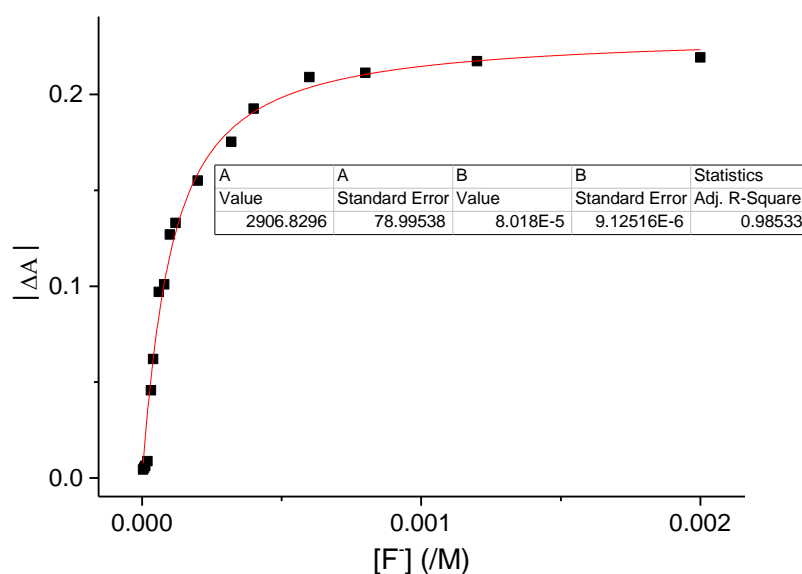

**Figure S1:** Non-linear curve fit of absorbance changes at 410 nm as a function of fluoride concentration.

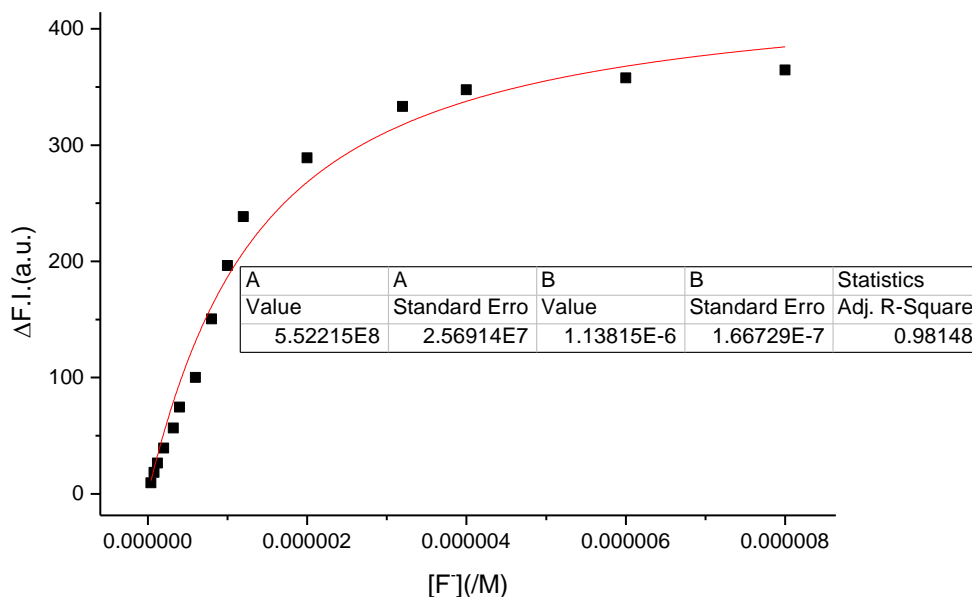

**Figure S2:** Non-linear curve fit of emission intensity at 376 nm as a function of fluoride concentration.

## 2. Calculation of detection limit

The detection limit (D) of BIP in emission spectra for fluoride ion was determined according to the followed equation:

$$D = 3S_b / k$$

Where  $S_b$  is the standard deviation of the blank solution;  $k$  is the slope of the curve.

From the Figure S3, we get the slope, which was 156553000. And the standard deviation  $S_b$  was 1.1166. Then the detection limit was obtained to be 0.021  $\mu$ M using the above-mentioned equation.

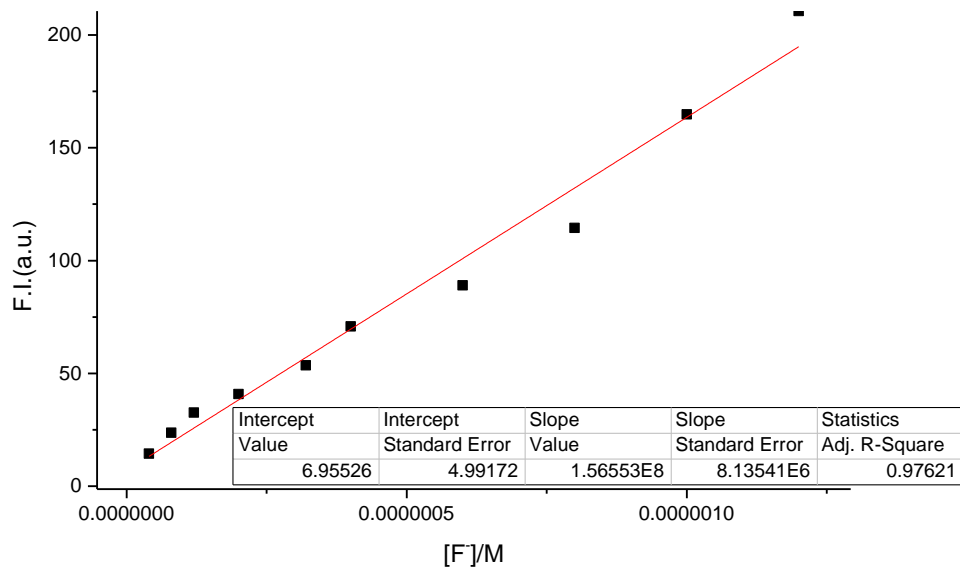

**Figure S3:** Changes of fluorescence intensity of BIP at 376 nm as a function of fluoride concentration.

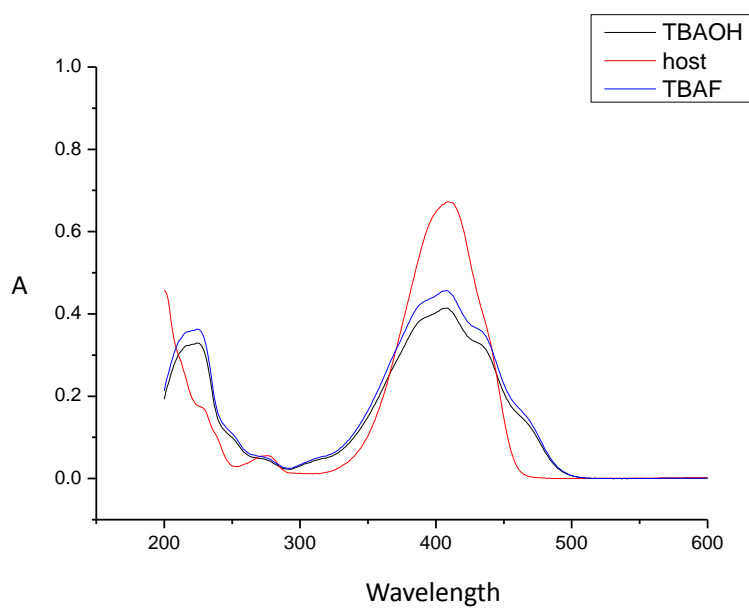

**Figure S4:** Spectral changes of BIP upon addition of  $F^-$  and  $OH^-$ .

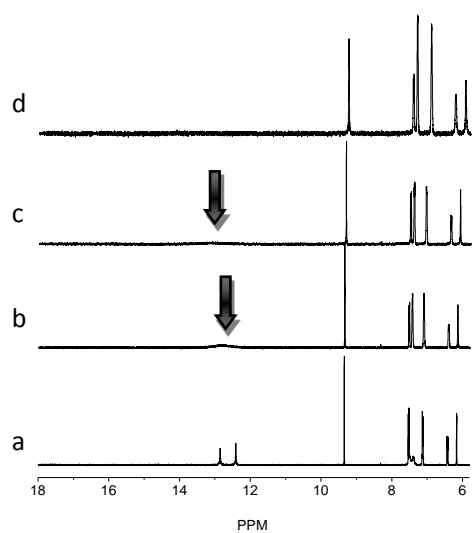

**Figure S5:** Partial <sup>1</sup>H NMR spectra of BIP in DMSO-*d*<sub>6</sub> upon the addition of F<sup>-</sup>: (a) 0 equiv; (b) 0.5 equiv; (c) 2.0 equiv; (d) 5.0 equiv. Arrow marked the NH signal.

a

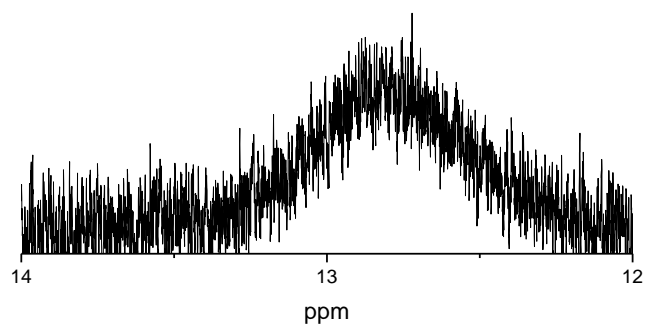

b

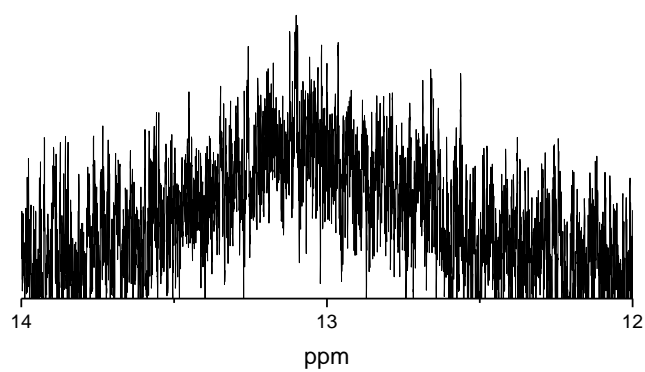

**Figure S6:** Partial  $^1\text{H}$  NMR spectra of BIP in  $\text{DMSO-}d_6$  upon the addition of  $\text{F}^-$ : (a) 0.5 equiv.; (b) 2.0 equiv.

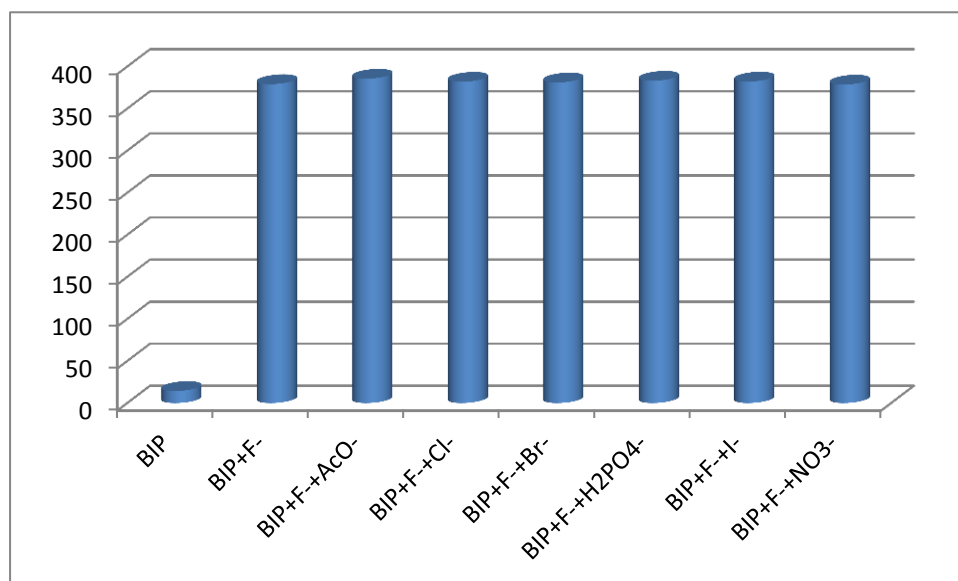

**Figure S7:** Emission spectral changes of BIP ( $4.0 \times 10^{-7}$  mol/l ) containing 20.0 equiv fluoride upon the addition of 20.0 equiv other anions ( $\text{Cl}^-$ ,  $\text{Br}^-$ ,  $\text{I}^-$ ,  $\text{H}_2\text{PO}_4^-$ ,  $\text{NO}_3^-$  and  $\text{AcO}^-$ ).
